# Supplementary material
Source: Springer Nature journal article supplement (https://www.springermedizin.de/resource/supplementary/12943_2012_1102_MOESM13_ESM.pdf/9552504)

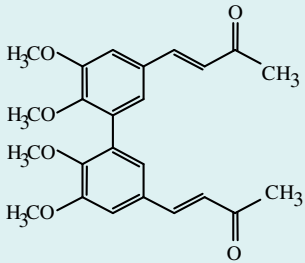

**D6**

**A**

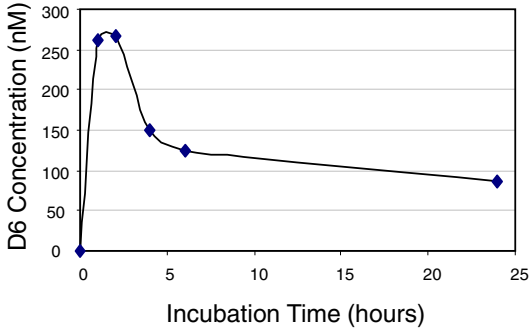

**B**

Supplement: MOESM13 [file 9552504]
